# Supplementary material for: c-di-GMP Arms an Anti-σ to Control Progression of Multicellular Differentiation in Streptomyces
Source: PubMed Central journal article supplement — Mol Cell. 2020 Feb 6;77(3):586–599.e6. doi: 10.1016/j.molcel.2019.11.006 (PMC7005675; doi:10.1016/j.molcel.2019.11.006), 2020-02-06
Supplement: mmc1.pdf [file mmc1.pdf]

**Molecular Cell, Volume 77**

**Supplemental Information**

**c-di-GMP Arms an Anti- $\sigma$  to Control Progression  
of Multicellular Differentiation in *Streptomyces***

**Kelley A. Gallagher, Maria A. Schumacher, Matthew J. Bush, Maureen J. Bibb, Govind Chandra, Neil A. Holmes, Wenjie Zeng, Max Henderson, Hengshan Zhang, Kim C. Findlay, Richard G. Brennan, and Mark J. Buttner**

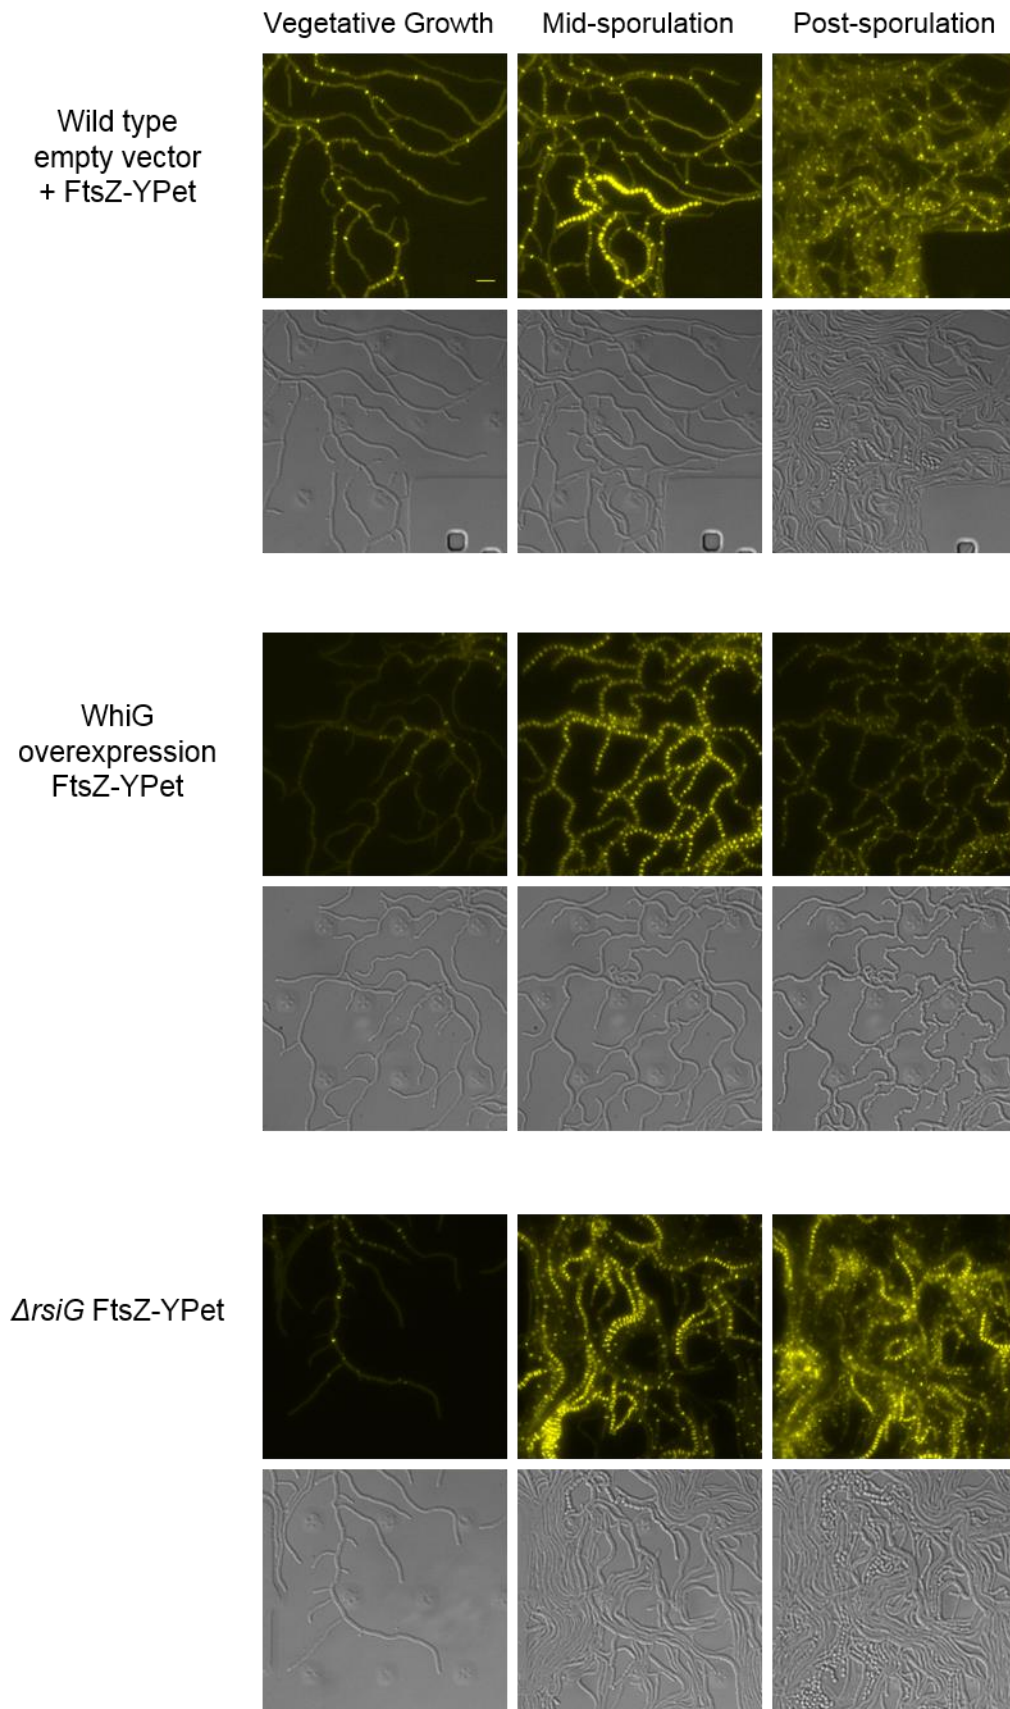

**Figure S1. Overexpression of *whiG* or deletion of *rsiG* causes hypersporulation during growth in liquid culture, related to Figure 1 and Figure 4.** Fluorescence (top) and DIC images (bottom) are stills taken from Movies S1-3. Scale bar = 5 $\mu$ m.

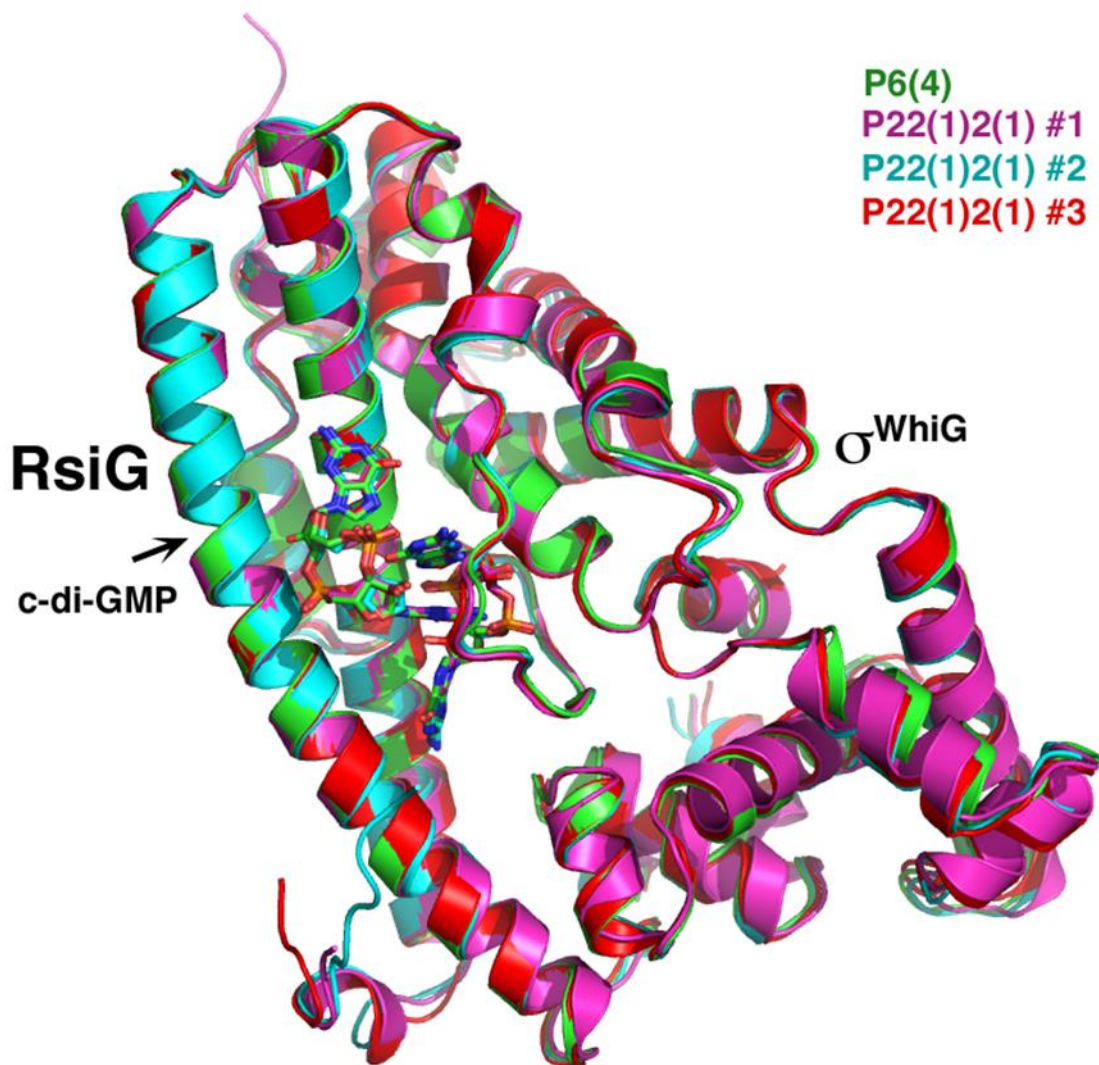

**Figure S2. Superimposition of the two RsiG- $\sigma^{\text{WhiG}}$  structures, related to Figure 5.** The one complex in the crystallographic asymmetric unit (ASU) from the 2.08 Å structure (the hexagonal crystal form) is colored green and the three complexes in the ASU from the 3.0 Å structure (the orthorhombic crystal form) are colored magenta, cyan and red. RsiG and  $\sigma^{\text{WhiG}}$  are labelled as is the c-di-GMP dimer bound between the proteins. All heterodimeric complexes are identical. Also, note, each c-di-GMP dimer adopts an identical conformation when bound to the RsiG- $\sigma^{\text{WhiG}}$  complex.

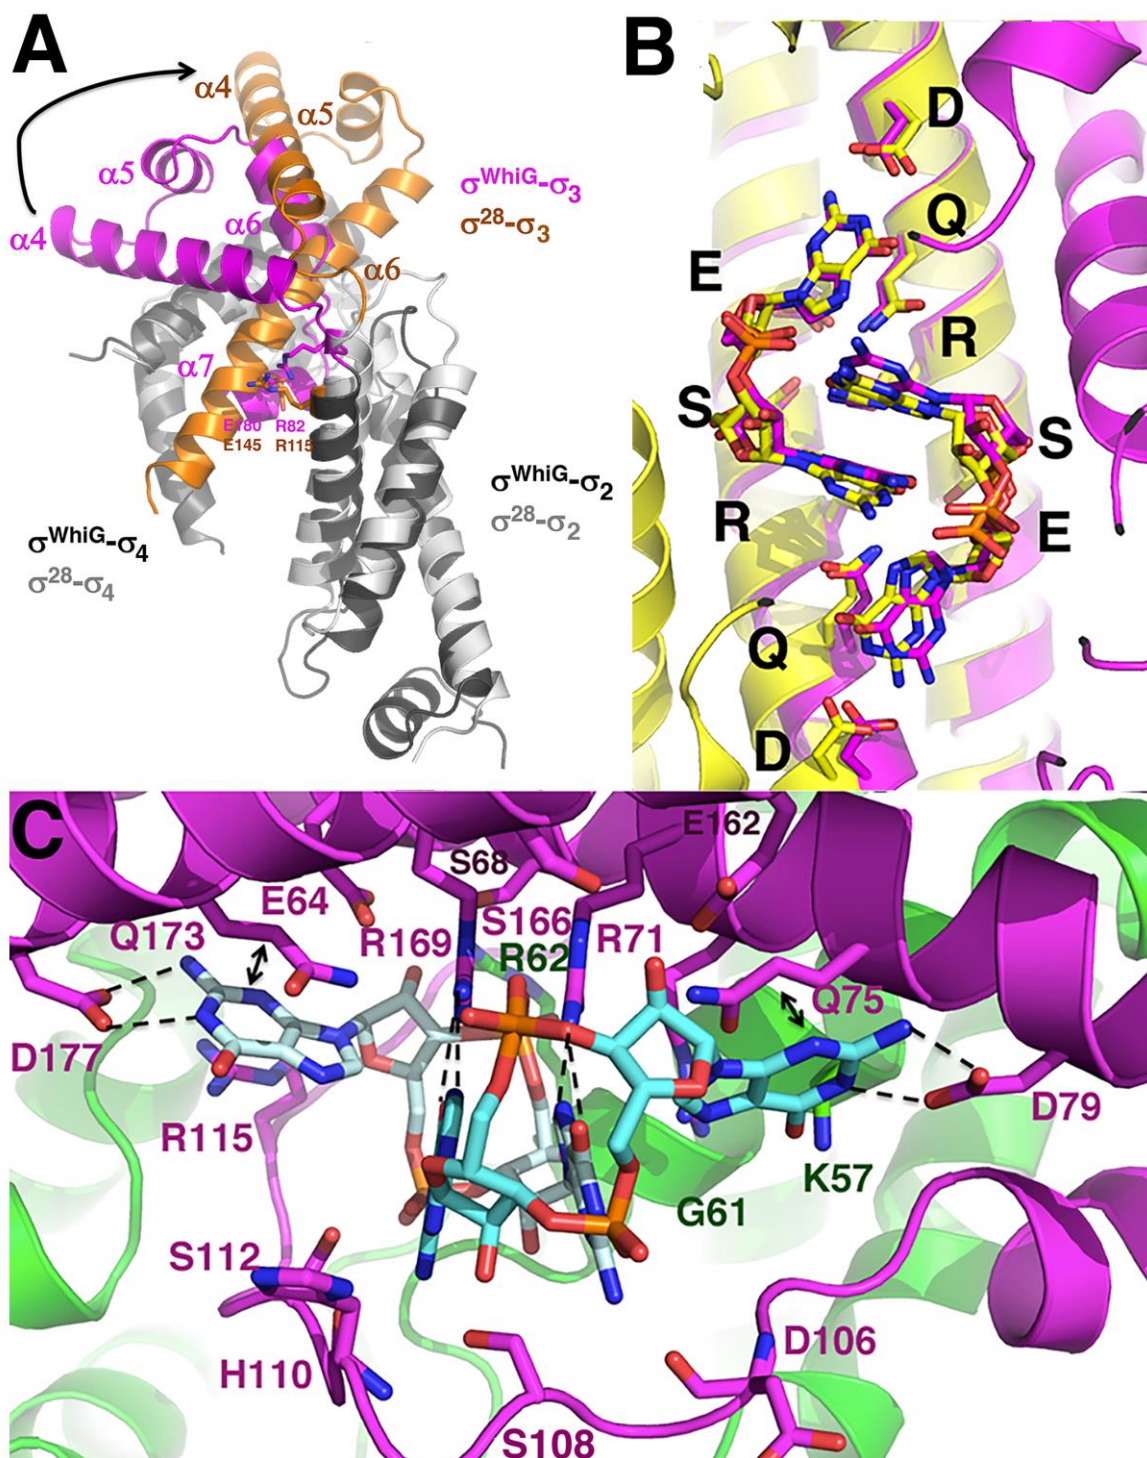

**Figure S3. Characterization of RsiG and  $\sigma^{\text{WhiG}}$  structure and detailed interactions, related to Figure 5.**

(A) Overlay of the RsiG bound  $\sigma^{\text{WhiG}}$  structure onto the FlgM bound  $\sigma^{28}$  structure (Sorenson et al., 2004).  $\sigma$  domains 2 and 4 are colored grey and black for  $\sigma^{28}$  and  $\sigma^{\text{WhiG}}$ , respectively. These domains overlay as a unit while the  $\sigma_3$  regions (colored orange and magenta  $\sigma^{28}$  and  $\sigma^{\text{WhiG}}$ , respectively) do not. Nonetheless a salt bridge is conserved between a conserved glutamate in  $\sigma_3$  and conserved arginine in  $\sigma_2$  of both proteins. (B) Superimposition of two RsiG structures whereby one E(X)<sub>3</sub>S(X)<sub>2</sub>R(X)<sub>3</sub>Q(X)<sub>3</sub>D repeat motif of one structure (magenta) was overlaid onto the second repeat of the other structure (yellow). The remaining helices and motifs of the two structures also superimpose as do the c-di-GMP dimers. (C) Detailed c-di-GMP interactions with RsiG and  $\sigma^{\text{WhiG}}$ . All residues that contact c-di-GMP are shown in the figure. H-bonds are indicated by dashed lines.

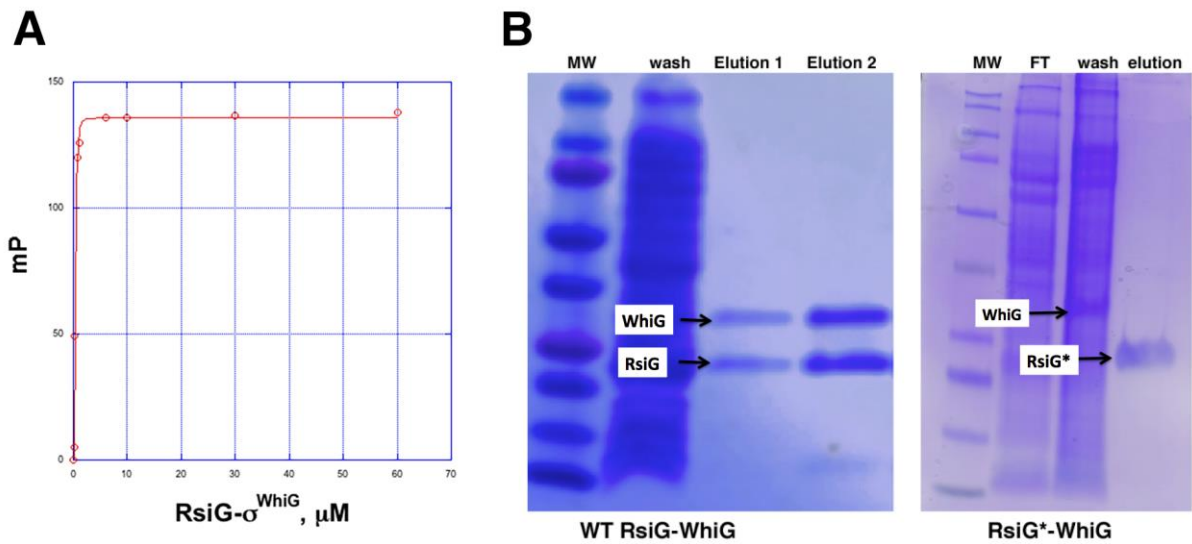

**Figure S4. c-di-GMP binds with high affinity to RsiG-  $\sigma^{\text{WhiG}}$  and is required for stable RsiG- $\sigma^{\text{WhiG}}$  complex formation, related to Figure 7.** (A) FP binding isotherm of the interaction between F-c-di-GMP and a solution with equimolar RsiG and  $\sigma^{\text{WhiG}}$ . The resultant  $K_d$  is  $0.39 \pm 0.05 \mu\text{M}$ . This experiment was repeated three times (technical replicates). (B) Coexpression of  $\sigma^{\text{WhiG}}$  with WT  $\text{his}_6$ -RsiG (left) or  $\text{his}_6$ -RsiG\* (right). The positions of the proteins on the gel are labelled and, as can be observed,  $\sigma^{\text{WhiG}}$  copurifies with WT  $\text{his}_6$ -RsiG but not with  $\text{his}_6$ -RsiG\*.

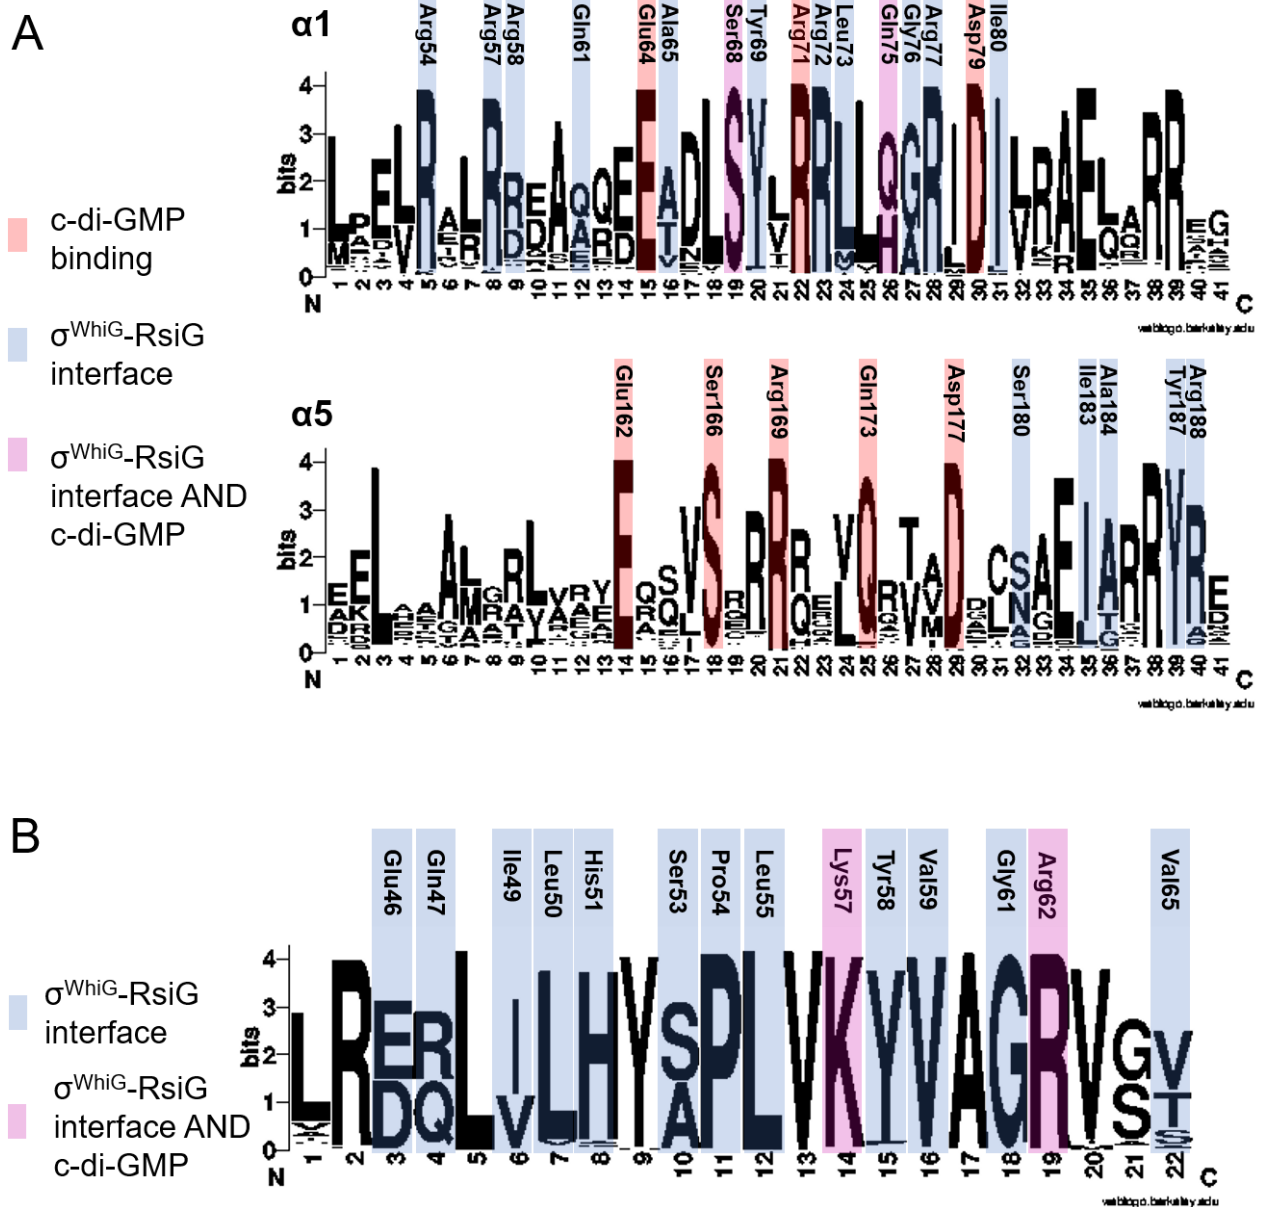

**Figure S5. Conservation of residues in RsiG and  $\sigma^{\text{WhiG}}$  involved in binding c-di-GMP, related to Figure 7.** (A) Sequence logos depicting amino acid sequence conservation of the two alpha helices involved in c-di-GMP binding among RsiG homologs in all bacteria. Residues involved in the  $\sigma^{\text{WhiG}}$ -RsiG interface and/or c-di-GMP binding are indicated. Note the conservation of the two E(X)<sub>3</sub>S(X)<sub>2</sub>R(X)<sub>3</sub>Q(X)<sub>3</sub>D signature c-di-GMP-binding motifs. Residues are numbered based on the *S. venezuelae* sequence. RsiG homologs were identified by a reciprocal BLAST search (e-value cut off = 0.001) of the 3,962 ‘reference’ or ‘representative’ annotated genomes available at GenBank, using the *S. venezuelae* RsiG sequence as a query. Homologs were aligned using MUSCLE (Edgar 2004). Fourteen sequences (all <41% sequence identity) that did not align well were removed from the analysis. The remaining 134 sequences were re-aligned, the regions of interest extracted, and the resulting alignments were used to create Weblogos (Crooks et al., 2004). (B) Sequence logo depicting amino acid sequence conservation of  $\sigma$  region 2.1 among  $\sigma^{\text{WhiG}}$  homologs that co-occur with RsiG. Residues involved in the  $\sigma^{\text{WhiG}}$ -RsiG interface and/or c-di-GMP binding are indicated. Note that the two  $\sigma^{\text{WhiG}}$  residues that make direct contacts to c-di-GMP, Lys57 and Arg62, are highly conserved. Residues are numbered based on the *S. venezuelae* sequence. Homologs were identified by a reciprocal BLAST search of the 134 genomes that contain a *rsiG* homolog, using the *S. venezuelae*  $\sigma^{\text{WhiG}}$  sequence as a query. The sequences were aligned using MUSCLE (Edgar 2004),  $\sigma$  region 2.1 was extracted and the resulting alignment used to create a Weblogo (Crooks et al., 2004).

---

**Table S1: Data collection and refinement statistics for RsiG- $\sigma^{\text{WhiG}}$  structures, related to Figures 5 and 6**

| Structure                                             | form 1:RsiG- $\sigma^{\text{WhiG}}$ | form 2:RsiG- $\sigma^{\text{WhiG}}$ |
|-------------------------------------------------------|-------------------------------------|-------------------------------------|
| PDB code                                              | 6PFJ                                | 6PFV                                |
| Space group                                           | P6 <sub>4</sub>                     | P22 <sub>1</sub> 2 <sub>1</sub>     |
| Cell constants (Å)                                    | a=b=92.1,c=96.6                     | a=79.8, b=97.3, c=204.6             |
| Cell angles (°)                                       | $\alpha=\beta=90.0, \gamma=120.0$   | $\alpha=\beta=\gamma=90.0$          |
| Resolution (Å)                                        | 79.8-2.08                           | 87.9-3.00                           |
| R <sub>sym</sub> (%) <sup>a</sup>                     | 5.1 (86.9) <sup>b</sup>             | 9.8 (99.8)                          |
| R <sub>pim</sub> (%)                                  | 1.4 (62.4)                          | 5.3 (65.3)                          |
| Overall I/ $\sigma$ (I)                               | 20.5 (1.4)                          | 8.9 (1.2)                           |
| #Unique Reflections                                   | 53900                               | 32724                               |
| #Total Reflections                                    | 410742                              | 132151                              |
| % Complete                                            | 96.2 (94.0)                         | 99.1 (99.1)                         |
| CC(1/2)                                               | 1.00 (0.537)                        | 0.997 (0.447)                       |
| Multiplicity                                          | 7.1 (7.0)                           | 4.0 (4.2)                           |
| <u>Refinement Statistics</u>                          |                                     |                                     |
| Resolution (Å)                                        | 79.8-2.08                           | 87.9-3.00                           |
| R <sub>work</sub> /R <sub>free</sub> (%) <sup>c</sup> | 19.5/23.8                           | 20.9/27.9                           |
| Rmsd                                                  |                                     |                                     |
| Bond angles (°)                                       | 1.38                                | 0.855                               |
| Bond lengths (Å)                                      | 0.004                               | 0.004                               |
| Ramachandran analysis                                 |                                     |                                     |
| Favored (%)                                           | 97.8                                | 91.0                                |
| Disallowed(%)                                         | 0.0                                 | 0.0                                 |

---

<sup>a</sup>R<sub>sym</sub> =  $\sum \sum |I_{hkl} - I_{hkl}(j)| / \sum I_{hkl}$ , where I<sub>hkl</sub>(j) is observed intensity and I<sub>hkl</sub> is the final average value of intensity. <sup>b</sup> values in parentheses are for the highest resolution shell. <sup>c</sup>R<sub>work</sub> =  $\sum ||F_{obs}| - |F_{calc}|| / \sum |F_{obs}|$  and R<sub>free</sub> =  $\sum ||F_{obs}| - |F_{calc}|| / \sum |F_{obs}|$ ; where all reflections belong to a test set of 5% randomly selected data.

**Table S2. Distribution of *rsiG* homologs in bacterial families, related to Figures 4, 5 and 6**

| <b>Family</b>       | <b>Number of <i>rsiG</i> homologs identified</b> | <b>Number of genomes in search set</b> |
|---------------------|--------------------------------------------------|----------------------------------------|
| Acidimicrobiaceae   | 2                                                | 3                                      |
| Acidothermaceae     | 1                                                | 1                                      |
| Actinopolysporaceae | 2                                                | 2                                      |
| Catenulisporaceae   | 1                                                | 1                                      |
| Cellulomonadaceae   | 1                                                | 8                                      |
| Conexibacteraceae   | 1                                                | 1                                      |
| Cryptosporangiaceae | 1                                                | 2                                      |
| Geodermatophilaceae | 16                                               | 16                                     |
| Ilumatobacteraceae  | 1                                                | 1                                      |
| Kineosporiaceae     | 1                                                | 1                                      |
| Nocardioideae       | 1                                                | 19                                     |
| Patulibacteraceae   | 1                                                | 1                                      |
| Pseudonocardiaceae  | 39                                               | 46                                     |
| Rubrobacteraceae    | 2                                                | 2                                      |
| Streptomycetaceae   | 63                                               | 63                                     |
| Thermoleophilaceae  | 1                                                | 1                                      |



**Table S3. Primers, plasmids, and strains used in this study, related to STAR Methods**

| Primers          | 5' sequence                                                                                                                                                                                                                                                  |                         |
|------------------|--------------------------------------------------------------------------------------------------------------------------------------------------------------------------------------------------------------------------------------------------------------|-------------------------|
| vnz26215_redi_F  | GACCGCGCTGCGGTGCCCCAGCAGCCCGGGGCACCGTGATTCGGGGATCCGTCGACC                                                                                                                                                                                                    |                         |
| vnz26215_redi_R  | TGGGCACGGCTCCACTGTACACCGGCTCGCCCGGTCATGTAGGCTGGAGCTGCTTC                                                                                                                                                                                                     |                         |
| vnz15005_redi_F  | GGCGTCCGAAAGCCGCGGAGGAAAGGAGCATGTGCATGATTCGGGGATCCGTCGACC                                                                                                                                                                                                    |                         |
| vnz15005_redi_R  | TCGTCTCATGCGGTATGGCCTCATGGCCATGGCCTCATGTAGGCTGGAGCTGCTTC                                                                                                                                                                                                     |                         |
| vnz19430_redi_F  | CGGTGCGCTCCGCACCGGTGAGGGGACGAATCTGATGATTCGGGGATCCGTCGACC                                                                                                                                                                                                     |                         |
| vnz19430_redi_R  | ACCCGCACGCGAGTTTTCCGGGCGCCGGGCCCGTCATGTAGGCTGGAGCTGCTTC                                                                                                                                                                                                      |                         |
| vnz26215_check_F | CGCATGCCCCAGCACACC                                                                                                                                                                                                                                           |                         |
| vnz26215_check_R | CTGCATCGTCCGGTGCTC                                                                                                                                                                                                                                           |                         |
| vnz15005_check_F | CGATCCGATGATCCGATCGGA                                                                                                                                                                                                                                        |                         |
| vnz15005_check_R | GTCGTCGATCCCCAGGTGA                                                                                                                                                                                                                                          |                         |
| vnz19430_check_F | TGCACCACTGCACGCATGC                                                                                                                                                                                                                                          |                         |
| vnz19430_check_R | GCTGCCAGTCGGGGAATC                                                                                                                                                                                                                                           |                         |
| vnz26215_comp_F  | GGCGAAGTTCCTGGAGCATTCCGGGTGA                                                                                                                                                                                                                                 |                         |
| vnz26215_comp_R  | GGGGTACCGGTGCTCGCCACCGAG                                                                                                                                                                                                                                     |                         |
| vnz19430_comp_F  | GGCGAAGTACCCTCTGCACCACTGCAC                                                                                                                                                                                                                                  |                         |
| vnz19430_comp_R  | GGGGTACCCATCCTCCGACCCTACGCAG                                                                                                                                                                                                                                 |                         |
| vnz26215_ermE_F  | GGGAATTCATATGCCCCAGCACACCTCCG                                                                                                                                                                                                                                |                         |
| vnz26215_ermE_R  | GGAAGCTTGGTGCTCGGCCACCGAG                                                                                                                                                                                                                                    |                         |
| HI_ermE_P1       | GTCTAGAACAGGAGGCCCATATGATACCCTTGCGCACACCATG                                                                                                                                                                                                                  |                         |
| HI_ermE_P2       | TTACCTCCGATGTTGAGTCAGTGTTCCGCGGGGGC                                                                                                                                                                                                                          |                         |
| HI_ermE_P3       | CGAACACTGACTCAACATCGGAGGTAAGCCATGTCCGTTCTCCTCGAG                                                                                                                                                                                                             |                         |
| HI_ermE_P4       | TGAGAACCCTAGGGGATCCAAAGCTTTCAGTGGATGATC                                                                                                                                                                                                                      |                         |
| vnz28820_qRT_F   | CGGGAGGTCGAGGTGCTCAG                                                                                                                                                                                                                                         |                         |
| vnz28820_qRT_R   | TGGCTTTCACGGTGAGGGC                                                                                                                                                                                                                                          |                         |
| hrdBqRT_F        | TGTTCTGCGCAGCCTCAATC                                                                                                                                                                                                                                         |                         |
| hrdBqRT_R        | CTCTTCGCTGCGACGCTCTT                                                                                                                                                                                                                                         |                         |
| vnz26215_BACTH_F | CTAGTCTAGAGATGCCCCAGCACACCTCCG                                                                                                                                                                                                                               |                         |
| vnz26215_BACTH_R | GGGGTACCCGGCGTCCGACGTCGGCCA                                                                                                                                                                                                                                  |                         |
| T18seq_F         | GTGTGGAATTGTGAGCGGAT                                                                                                                                                                                                                                         |                         |
| T18seq_R         | TTCCACAACAAGTCGATGCG                                                                                                                                                                                                                                         |                         |
| T25seq_F         | CGGTGACCAAGCGGCGATT                                                                                                                                                                                                                                          |                         |
| T25seq_R         | GGCGATTAAGTTGGGTAACGCC                                                                                                                                                                                                                                       |                         |
| NT25seq_F        | CCCCAGGCTTTACACTTTATGC                                                                                                                                                                                                                                       |                         |
| NT25seq_R        | TTGATGCCATCGAGTACGGCT                                                                                                                                                                                                                                        |                         |
| T18Cseq_F        | GTGCCGAGCGGACGTTCA                                                                                                                                                                                                                                           |                         |
| T18Cseq_R        | CTTAACTATGCGGCATCAGAGC                                                                                                                                                                                                                                       |                         |
| vnz19430_BACTH_F | GGGGTACCCGGGCGAGCAGGTCGTCGAC                                                                                                                                                                                                                                 |                         |
| vnz19430_BACTH_R | CTAGTCTAGAGATGAGTGACCTGGCACCCGG                                                                                                                                                                                                                              |                         |
| vnz26215_MCS1_F  | CCGGAATTCGATGCCCCAGCACACCTCCG                                                                                                                                                                                                                                |                         |
| vnz26215_MCS1_R  | CCCAAGCTTTCAGCGTCCGACGTCGGC                                                                                                                                                                                                                                  |                         |
| vnz19430_MCS2_F  | GGGAATTCATATGAGTGACCTGGCACCCGG                                                                                                                                                                                                                               |                         |
| vnz19430_MCS2_R  | GGGGTACCTCAGGCGAGCAGGTCGTCG                                                                                                                                                                                                                                  |                         |
| Plasmid          | Relevant genotype/comments                                                                                                                                                                                                                                   | Source                  |
| pIJ790           | Modified I RED recombination plasmid [ <i>oriR101</i> ] [ <i>repA101(ts)</i> ] <i>araBp-gam-be-exo</i>                                                                                                                                                       | Gust et al., 2003       |
| pIJ773           | Plasmid template for amplification of the apr <i>oriT</i> cassette for 'Redirect' PCR-targeting                                                                                                                                                              | Gust et al., 2003       |
| pIJ10770         | Plasmid cloning vector for the conjugal transfer of DNA from <i>E. coli</i> to <i>Streptomyces</i> spp. Integrates site specifically at the $\Phi$ BT1 attachment site ( <i>Hyg<sup>R</sup></i> ).                                                           | Schlimpert et al., 2017 |
| pIJ10900         | pIJ10770 carrying <i>whiG</i> driven from its own promoter                                                                                                                                                                                                   | This work               |
| pIJ10901         | pIJ10770 carrying <i>rsiG</i> driven from its own promoter                                                                                                                                                                                                   | This work               |
| pIJ10913         | pIJ10770 carrying <i>rsiG*</i> driven from the WT <i>rsiG</i> promoter                                                                                                                                                                                       |                         |
| pIJ10257         | Plasmid cloning vector for the conjugal transfer of DNA (under control of the <i>ermE*</i> constitutive promoter) from <i>E. coli</i> to <i>Streptomyces</i> spp. Integrates site specifically at the $\Phi$ BT1 attachment site ( <i>Hyg<sup>R</sup></i> ). | Hong et al., 2005       |
| pIJ10902         | pIJ10257 carrying <i>whiG</i> , driven by <i>ermE*</i>                                                                                                                                                                                                       | This work               |
| pIJ10906         | pIJ10257 carrying <i>whiH</i> and <i>whiI</i> , driven by <i>ermE*</i>                                                                                                                                                                                       | This work               |
| pKT25            | Two-hybrid plasmid, N-terminal <i>cyaAT25</i> fusion ( <i>Kan<sup>R</sup></i> )                                                                                                                                                                              | Karimova et al., 1998   |
| pKNT25           | Two-hybrid plasmid, C-terminal <i>cyaAT25</i> fusion ( <i>Kan<sup>R</sup></i> )                                                                                                                                                                              | Karimova et al., 1998   |
| pUT18            | Two-hybrid plasmid, C-terminal <i>cyaAT18</i> fusion ( <i>Amp<sup>R</sup></i> )                                                                                                                                                                              | Karimova et al., 1998   |

| Plasmid     | Relevant genotype/comments                                                                                                                                                                                                                            | Source                  |
|-------------|-------------------------------------------------------------------------------------------------------------------------------------------------------------------------------------------------------------------------------------------------------|-------------------------|
| pUT18C      | Two-hybrid plasmid, N-terminal <i>cyaA</i> T18fusion (Amp <sup>R</sup> )                                                                                                                                                                              | Karimova et al., 1998   |
| pKT25-zip   | A derivative of pKT25 in which the leucine zipper of GCN4 is genetically fused in frame to the T25 fragment                                                                                                                                           | Karimova et al., 1998   |
| pUT18C-zip  | A derivative of pUT18C in which the leucine zipper of GCN4 is genetically fused in-frame to the T18 fragment                                                                                                                                          | Karimova et al., 1998   |
| pIJ10907    | pKT25 carrying <i>whiG</i>                                                                                                                                                                                                                            | This work               |
| pIJ10908    | pKNT25 carrying <i>whiG</i>                                                                                                                                                                                                                           | This work               |
| pIJ10909    | pUT18 carrying <i>whiG</i>                                                                                                                                                                                                                            | This work               |
| pIJ10910    | pUT18C carrying <i>whiG</i>                                                                                                                                                                                                                           | This work               |
| pIJ10911    | pKT25 carrying <i>rsiG</i>                                                                                                                                                                                                                            | This work               |
| pIJ10912    | pUT18 carrying <i>rsiG</i>                                                                                                                                                                                                                            | This work               |
| pCOLADuet-1 | Expression vector for coexpression of two target genes, each under the control of a T7 promoter (Kan <sup>R</sup> )                                                                                                                                   | Novagen                 |
| pET15B      | T7 expression vector (Amp <sup>R</sup> )                                                                                                                                                                                                              | Novagen                 |
| pIJ10914    | pCOLADuet-1 carrying <i>whiG</i> at MCS1 and <i>rsiG</i> at MCS2                                                                                                                                                                                      | This work               |
| pIJ10915    | pCOLADuet-1 carrying $\Delta 26$ <i>rsiG</i> at MCS1 and <i>whiG</i> at MCS2 (genes codon optimized for <i>E. coli</i> )                                                                                                                              | This work               |
| pIJ10916    | pCOLADuet-1 carrying $\Delta 26$ <i>rsiG</i> * at MCS1 and <i>whiG</i> at MCS2 (genes codon optimized for <i>E. coli</i> )                                                                                                                            | This work               |
| pIJ10917    | pCOLADuet-1 carrying <i>rsiG</i> at MCS1                                                                                                                                                                                                              | This work               |
| pIJ10918    | pET15B carrying <i>rsiG</i> * (gene codon optimized for <i>E. coli</i> )                                                                                                                                                                              | This work               |
| pIJ10919    | pCOLADuet-1 carrying $\Delta 26$ <i>rsiG</i> (L56M-L85M) at MCS1 (gene codon optimized for <i>E. coli</i> )                                                                                                                                           | This work               |
| pIJ10920    | pCOLADuet-1 carrying <i>whiG</i> at MCS1 (gene codon optimized for <i>E. coli</i> )                                                                                                                                                                   | This work               |
| pKF351      | Plasmid cloning vector for the conjugal transfer of DNA from <i>E. coli</i> to <i>Streptomyces</i> spp. Integrates site specifically at the $\Phi$ C31 attachment site (Hyg <sup>R</sup> ) and carries <i>ftsZ-ypet</i> driven from its own promoter. | Schlimpert et al., 2017 |
| pSS5        | Plasmid cloning vector for the conjugal transfer of DNA from <i>E. coli</i> to <i>Streptomyces</i> spp. Integrates site specifically at the $\Phi$ BT1 attachment site (Hyg <sup>R</sup> ) and carries <i>ftsZ-ypet</i> driven from its own promoter. | Schlimpert et al., 2017 |

| Strains                      | Relevant genotype/notes                                                                                                                                                                                                    | Reference                |
|------------------------------|----------------------------------------------------------------------------------------------------------------------------------------------------------------------------------------------------------------------------|--------------------------|
| <b><i>S. venezuelae</i></b>  |                                                                                                                                                                                                                            |                          |
| ATCC10712                    | wild type                                                                                                                                                                                                                  |                          |
| SV6                          | $\Delta$ <i>whiG::apr</i>                                                                                                                                                                                                  | This work                |
| SV80                         | $\Delta$ <i>vnz15005::apr</i>                                                                                                                                                                                              | This work                |
| SV81                         | $\Delta$ <i>rsiG::apr</i>                                                                                                                                                                                                  | This work                |
| SV6-pIJ10770                 | $\Delta$ <i>whiG::apr</i> with pIJ10770 integrated at the $\Phi$ BT1 attachment site                                                                                                                                       | This work                |
| SV6-pIJ10900                 | $\Delta$ <i>whiG::apr</i> with pIJ10900 integrated at the $\Phi$ BT1 attachment site                                                                                                                                       | This work                |
| <i>Sven</i> -pIJ10257        | wild type with pIJ10257 integrated at the $\Phi$ BT1 attachment site                                                                                                                                                       | This work                |
| <i>Sven</i> -pIJ10902        | wild type with pIJ10902 integrated at the $\Phi$ BT1 attachment site                                                                                                                                                       | This work                |
| SV6-pIJ10257                 | $\Delta$ <i>whiG::apr</i> with pIJ10257 integrated at the $\Phi$ BT1 attachment site                                                                                                                                       | This work                |
| SV6-pIJ10906                 | $\Delta$ <i>whiG::apr</i> with pIJ10906 integrated at the $\Phi$ BT1 attachment site                                                                                                                                       | This work                |
| SV81-pIJ10770                | $\Delta$ <i>rsiG::apr</i> with pIJ10770 integrated at the $\Phi$ BT1 attachment site                                                                                                                                       | This work                |
| SV81-pIJ10901                | $\Delta$ <i>rsiG::apr</i> with pIJ10901 integrated at the $\Phi$ BT1 attachment site                                                                                                                                       | This work                |
| SV81-pIJ10913                | $\Delta$ <i>rsiG::apr</i> with pIJ10913 integrated at the $\Phi$ BT1 attachment site                                                                                                                                       | This work                |
| <i>Sven</i> -pIJ10257-pKF351 | wild type with pIJ10257 integrated at the $\Phi$ BT1 attachment site and pKF351 integrated at the $\Phi$ C31 attachment site                                                                                               | This work                |
| <i>Sven</i> -pIJ10902-pKF351 | wild type with pIJ10902 integrated at the $\Phi$ BT1 attachment site and pKF351 integrated at the $\Phi$ C31 attachment site                                                                                               | This work                |
| SV81-pSS5                    | $\Delta$ <i>rsiG::apr</i> with pSS5 integrated at the $\Phi$ BT1 attachment site                                                                                                                                           | This work                |
| <b><i>E. coli</i></b>        |                                                                                                                                                                                                                            |                          |
| DH5 $\alpha$                 | F- $\phi$ 80/ <i>lacZ</i> $\Delta$ M15 $\Delta$ ( <i>lacZYA-argF</i> )U169 <i>recA1 endA1 hsdR17</i> (rK-, mK+) <i>phoA supE44</i> $\lambda$ - <i>thi-1 gyrA96 relA1</i>                                                   | Invitrogen               |
| ET12567(pUZ8002)             | ET12567 containing helper plasmid pUZ8002                                                                                                                                                                                  | Paget et al., 1999       |
| BW25113                      | $\Delta$ ( <i>araD-araB</i> )567 $\Delta$ <i>lacZ4787</i> (:: <i>rrnB-4</i> ) <i>lacI</i> p-4000( <i>lacI</i> <sup>q</sup> ), $\lambda$ - <i>rpoS369</i> (Am) <i>rph-1</i> $\Delta$ ( <i>rhaD-rhaB</i> )568 <i>hsdR514</i> | Datsenko and Wanner 2000 |
| BTH101                       | F- <i>cya-99 araD139 galE15 galK16 rpsL1</i> ( <i>Strr</i> ) <i>hsdR2 mcrA1 mcrB1</i>                                                                                                                                      | Karimova et al., 1998    |
| BL21 pLysS Rosetta           | F- <i>ompT hsdSB</i> (rB- mB-) <i>gal dcm</i> (DE3) pLysSRARE (Cam <sup>R</sup> )                                                                                                                                          | Novagen                  |
